# Supplementary material for: CABE-RY: A PAM-flexible dual-mutation base editor for reliable modeling of multi-nucleotide variants
Source: PubMed Central journal article supplement — Mol Ther Nucleic Acids. 2021 Jul 29;26:114–21. doi: 10.1016/j.omtn.2021.07.016 (PMC8413891; doi:10.1016/j.omtn.2021.07.016), 2021-07-29
Supplement: mmc1.pdf [file mmc1.pdf]

OMTN, Volume 26

## **Supplemental information**

**CABE-RY: A PAM-flexible dual-mutation**

**base editor for reliable modeling**

**of multi-nucleotide variants**

**Wanyu Tao, Qing Liu, Shisheng Huang, Xin Wang, Shiyuan Qu, Junfan Guo, Danfeng Ou, Guanglei Li, Yu Zhang, Xiangmin Xu, and Xingxu Huang**

A

|                        |                  |
|------------------------|------------------|
| ACT (Thr) → ATT (Ile)  | Changed missense |
| ACT (Thr) → TCT (Ser)  |                  |
| ACT (Thr) → TTT (Phe)  |                  |
| AGA (Arg) → ACA (Thr)  |                  |
| AGA (Arg) → AGT (Ser)  |                  |
| AGA (Arg) → ACT (Thr)  |                  |
| CTT (Leu) → CTA (Leu)  |                  |
| CTT (Leu) → TTT (Phe)  |                  |
| CTT (Leu) → TTA (Leu)  |                  |
| CGG (Arg) → AGG (Arg)  |                  |
| CGG (Arg) → CGT (Arg)  | Rescued nonsense |
| GAG (Glu) → TAG (STOP) |                  |
| GAG (Glu) → GTG (Val)  |                  |
| GAG (Glu) → TTG (Leu)  | Gained nonsense  |
| TCC (Ser) → TCA (Ser)  |                  |
| TCC (Ser) → TGC (Cys)  |                  |
| TCC (Ser) → TGA (STOP) |                  |

B

| A/C simultaneous conversion |   |           |
|-----------------------------|---|-----------|
| GTN (Val)                   | → | ACN (Thr) |
| TGG (Trp)                   | → | CAA (Gln) |
| ACN (Thr)                   | → | GTN (Val) |
| TGY (Cys)                   | → | CAY (His) |
| CAA (Gln)                   | → | TGG (Trp) |
| CAY (His)                   | → | TGY (Cys) |

C

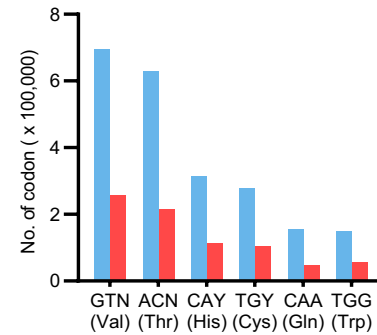

### Supplemental Figure 1. Further analysis of MNVs.

(A) Examples of the differences in functional impacts on the protein between MNVs and individual SNVs.

(B) Six amino acid changes can be achieved uniquely by simultaneous A/C conversion.

(C) The PAM-flexible dual-mutation base editor can target more specific codons in the human genome than existing editors.

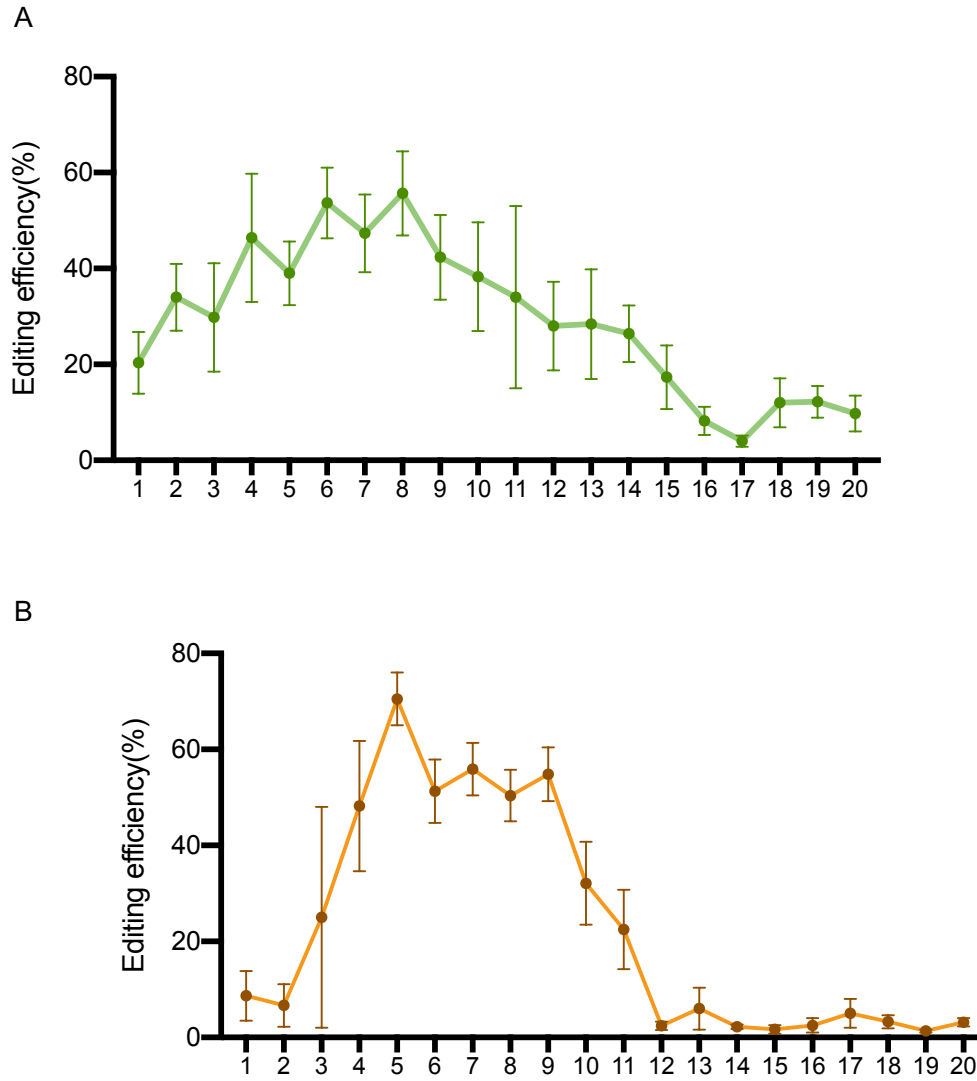

**Supplemental Figure 2. Mean nuclease activity plots for a single base editor across NNN PAMs in human cells.**

(A) Mean nuclease activity plots for ABE8e(V106W)-RY across NNN PAMs in human cells. The error bars represent the standard error of the mean (SEM) values.

(B) Mean nuclease activity plots for A3A(Y130F)-RY across NNN PAMs in human cells. The error bars represent the standard error of the mean (SEM) values.

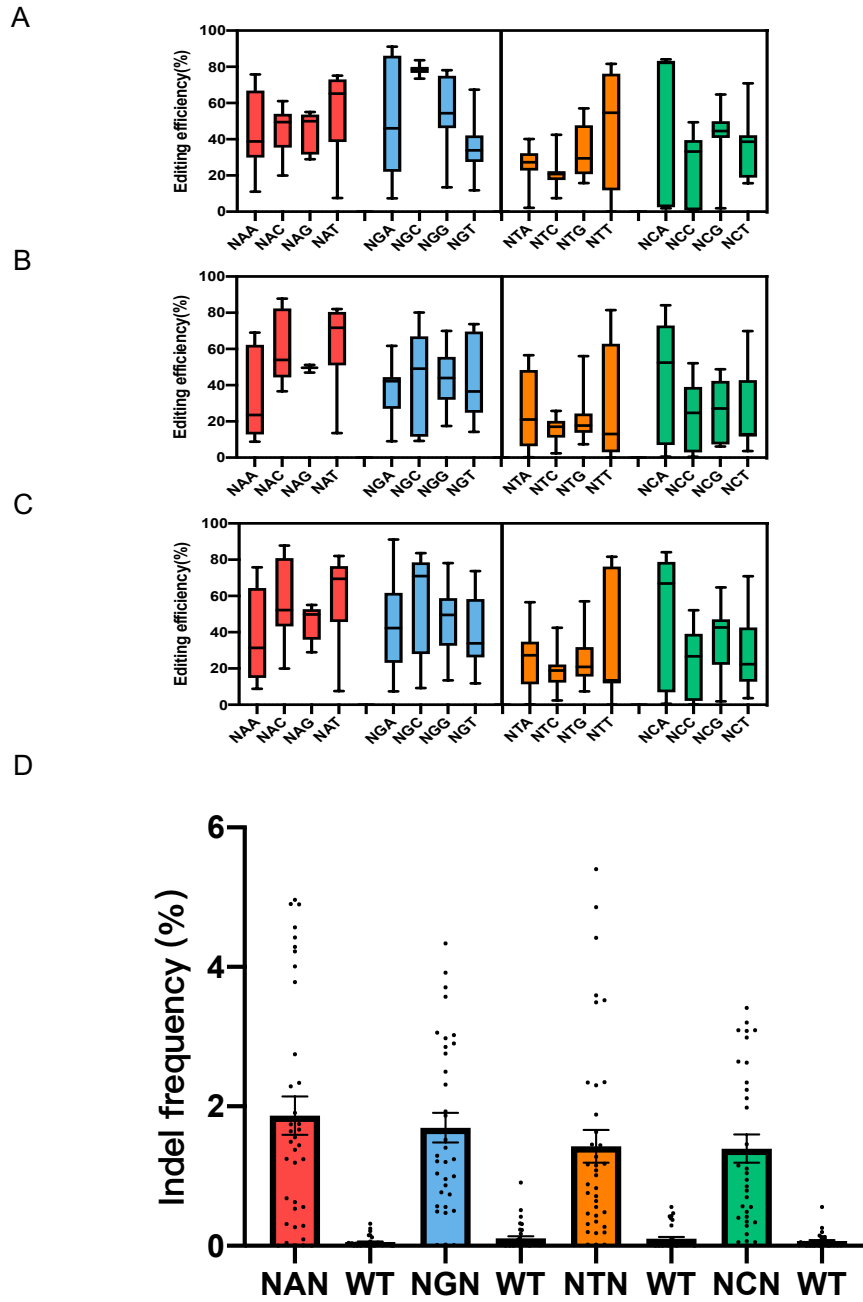

**Supplemental Figure 3. Other characteristics of CABE-RY at 48 endogenous target sites.**

(A, B, C) Aggregate distribution of C-to-T edits (A), A-to-G edits (B) and overall edits (C) across the editing window with CABE-RY.

(D) Box plots indicating the average indel frequencies. The error bars represent the standard error of the mean (SEM) values.



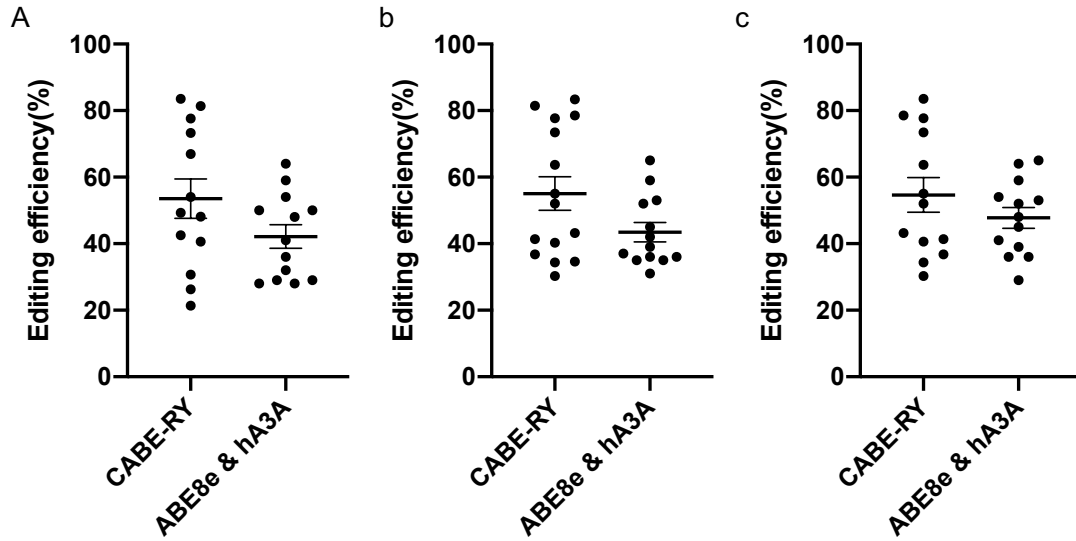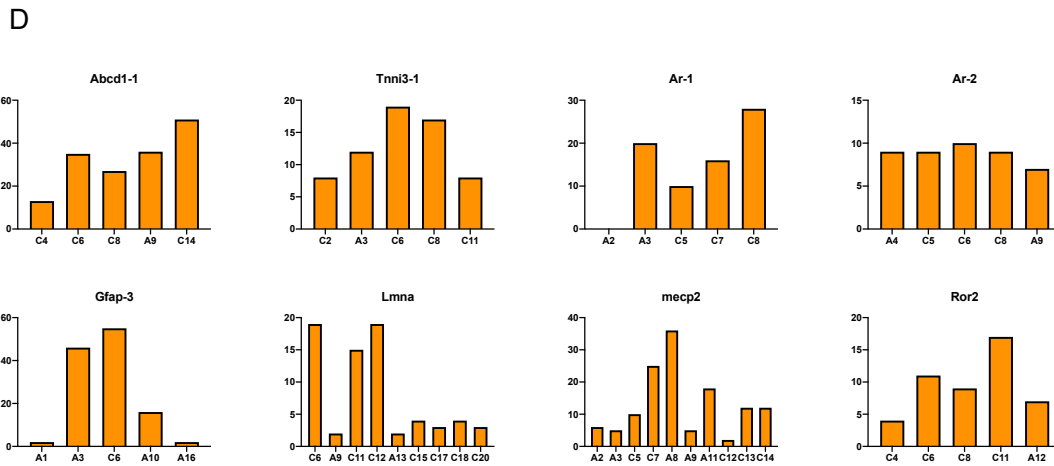

**Supplemental Figure 4. Further analysis of CABE-RY.**

(A, B, C) Comparison of simultaneous A/C conversion between CABE-RY and coexpressed ABE8e(V106W)-RY and ha3A(Y130F)-RY in HEK 293T cells. The scatter plot shows the efficiency of C-to-T (A), A-to-G (B) and overall edits (C) across the editing window with CABE-RY.

(D) Editing efficiency of CABE-RY in the N2a cell line.

A

| Sample         | Raw reads  | Mapped reads | Off-target edits (totals) | Off-target edits (A-to-I) | Off-target edits (C-to-U) |
|----------------|------------|--------------|---------------------------|---------------------------|---------------------------|
| GFP-1          | 24,043,676 | 21,021,190   | 428                       | 325                       | 16                        |
| GFP-2          | 22,677,528 | 20,233,880   | 618                       | 475                       | 19                        |
| ABE8e(V106W)-1 | 21,999,661 | 17,071,710   | 8,462                     | 8,350                     | 21                        |
| ABE8e(V106W)-2 | 19,862,432 | 15,371,901   | 9,765                     | 9,633                     | 21                        |
| hA3A(Y130F)-1  | 20,294,961 | 15,491,241   | 508                       | 331                       | 72                        |
| hA3A(Y130F)-2  | 20,592,803 | 15,613,140   | 506                       | 313                       | 116                       |
| CABE-RY-1      | 21,168,535 | 17,376,848   | 2,944                     | 2,853                     | 17                        |
| CABE-RY-2      | 20,020,981 | 16,466,648   | 2,748                     | 2,637                     | 24                        |

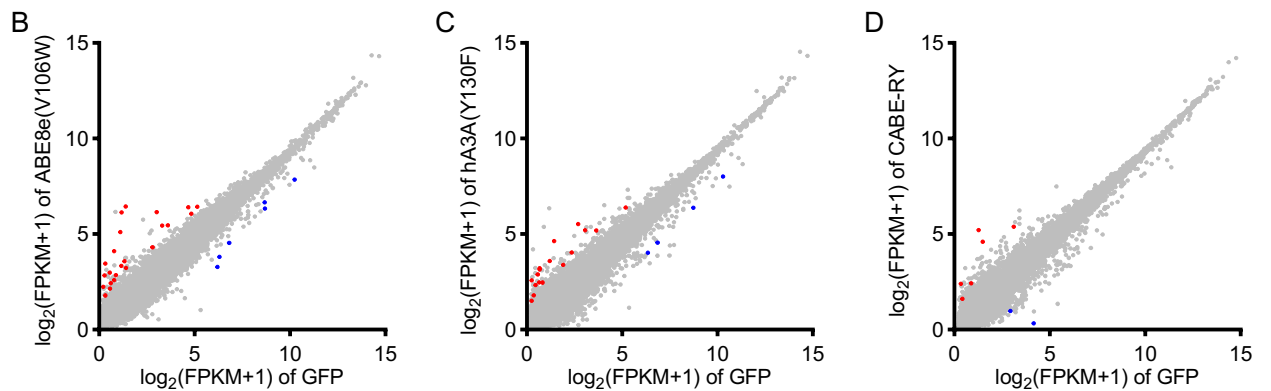

**Supplemental Figure 5. Further description of the RNA-seq data for transcriptome-wide off-target analysis.**

(A) Sequencing information and the number of off-target edits for each sample.

(B, C, D) Transcriptome-wide expression levels of ABE8e(V106W) (B), hA3A(Y130F) (C) and CABE-RY (D) compared to GFP (control). Shown is the mean of two biological replicates. The upregulated genes are labeled in red, and the downregulated genes are labeled in blue.

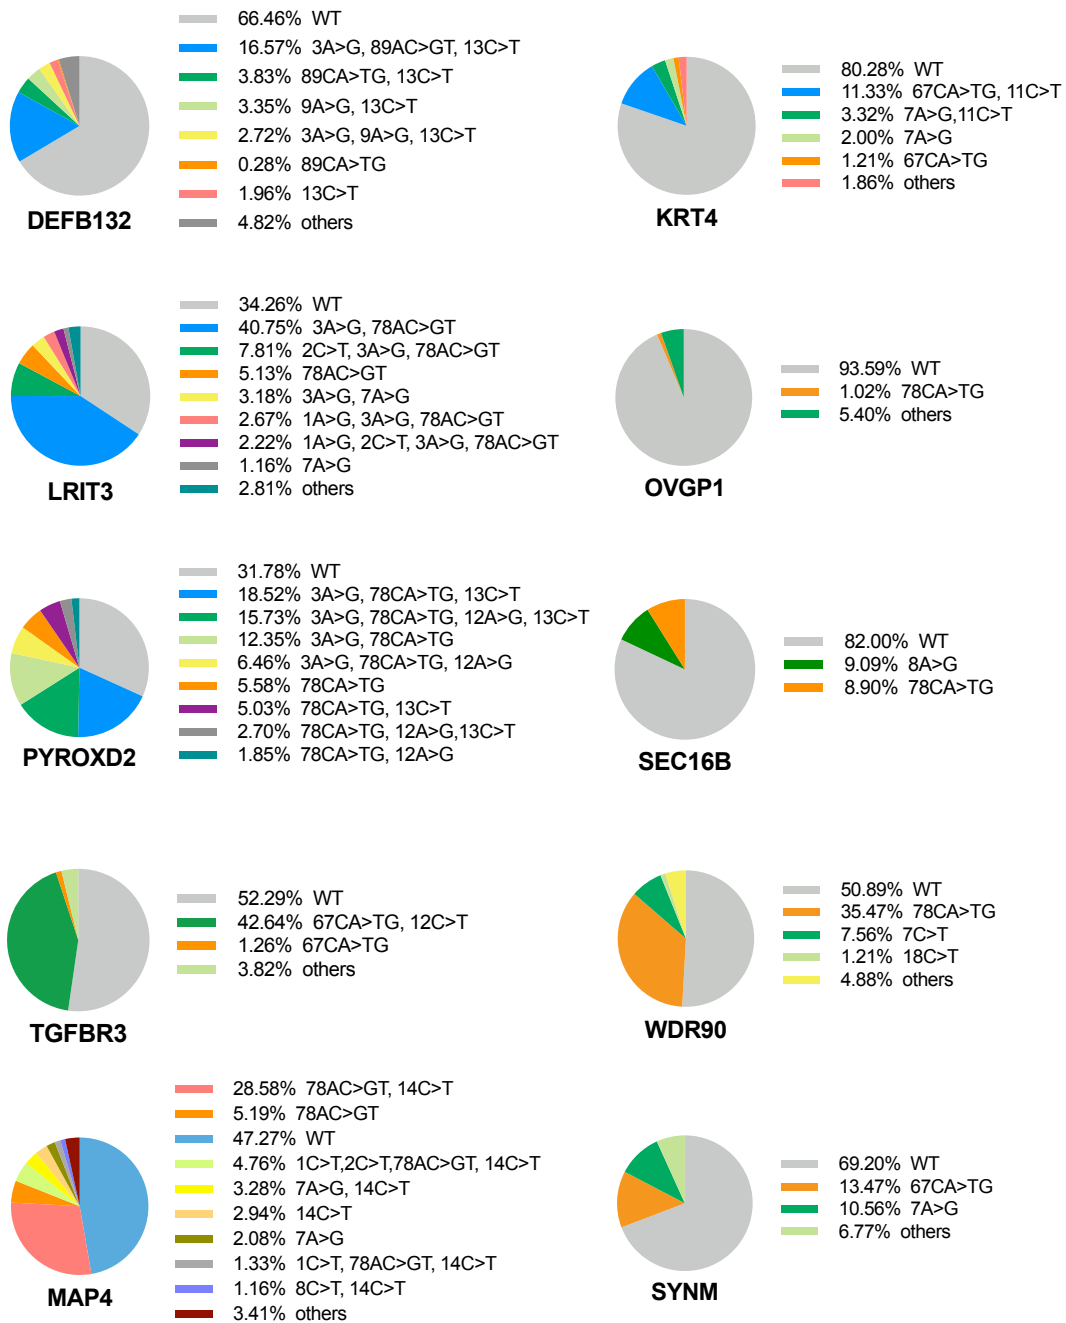

**Supplemental Figure 6. Mutation types of simulated MNVs.**

The pie chart shows the proportions of mutation types at the ten sites. Only alleles with at least 1% abundance are included. The proportion of perfect MNV is indicated with orange.

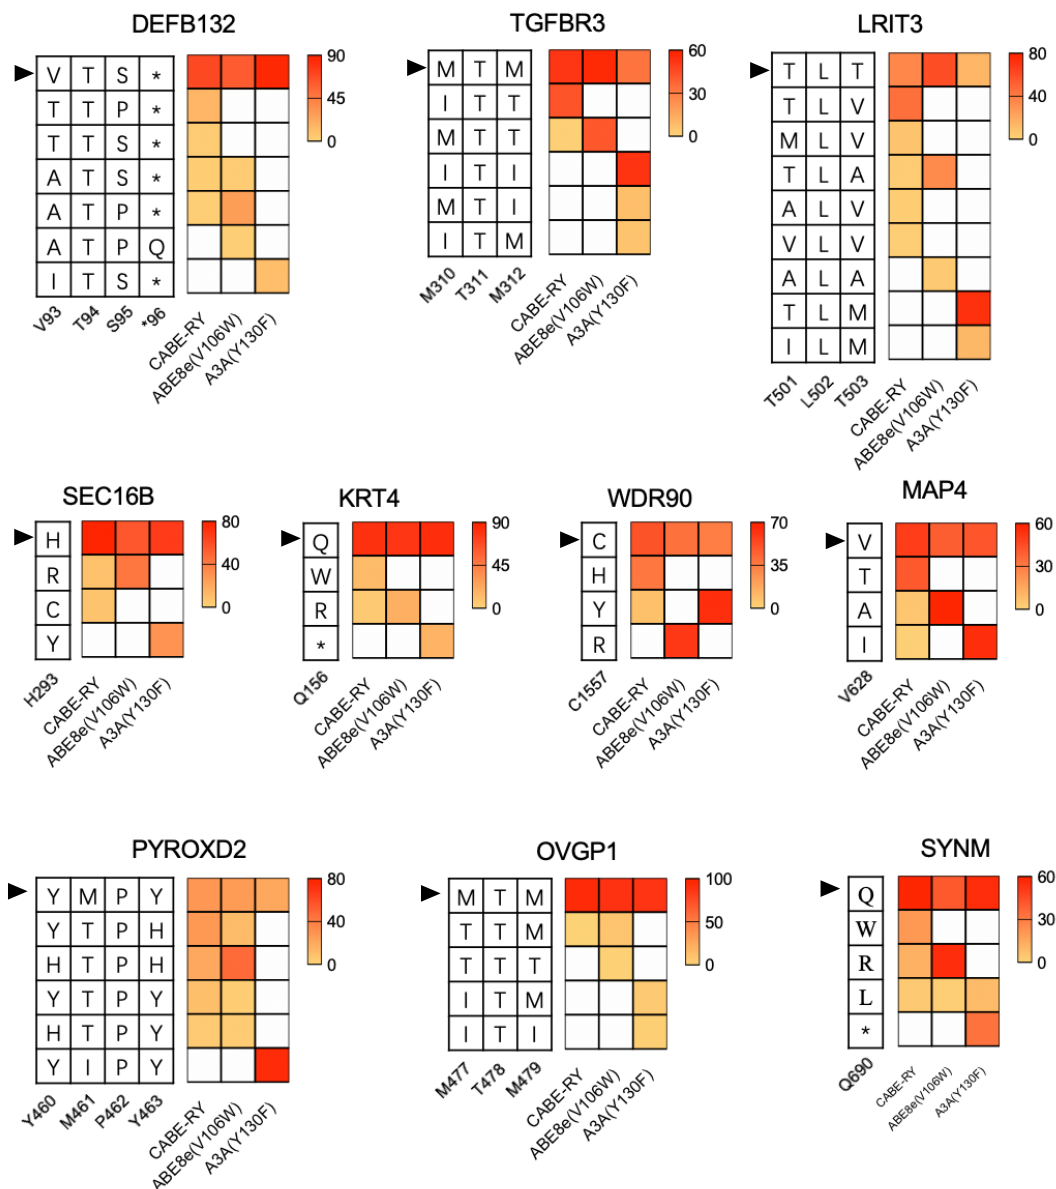

**Supplemental Figure 7. Amino acid changes in MNV models.**

The amino acid edits are summarized in the map on the left; the mean frequencies of amino acid edits are shown in the heatmap. The wild-type (unedited) allele is indicated with a black triangle.

Only alleles with at least 1% abundance are included in the heatmap.

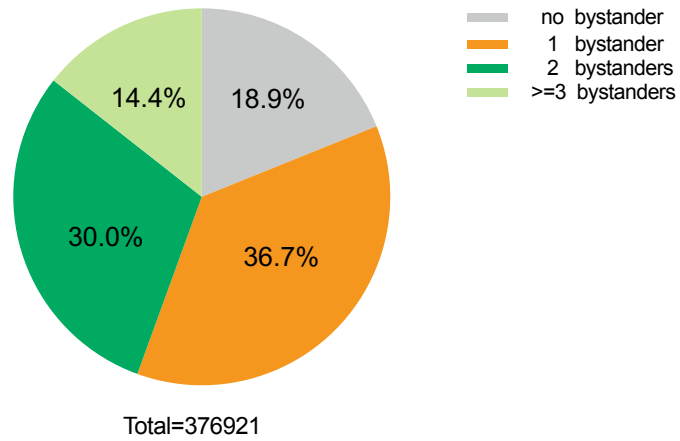

**Supplemental Figure 8. Bystander effect in gnomAD.**

The pie chart shows the proportions of bystanders obtained for modeling of two adjacent MNVs in gnomAD. The main editing window (5-10 for C-to-T, 3-8 for A-to-G) was used for analysis.

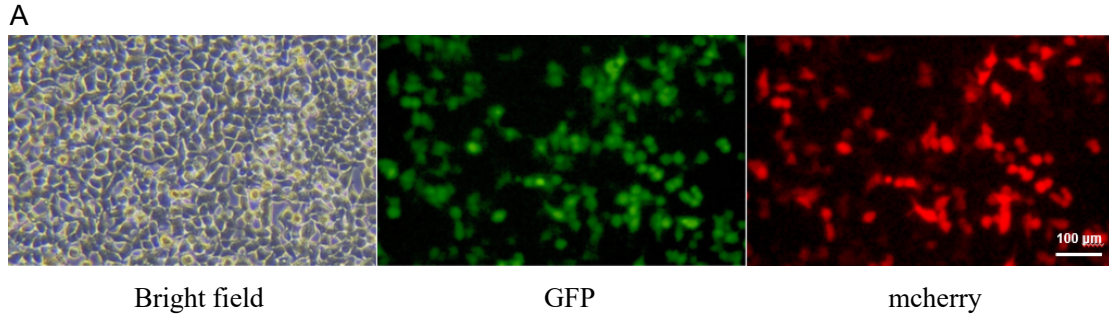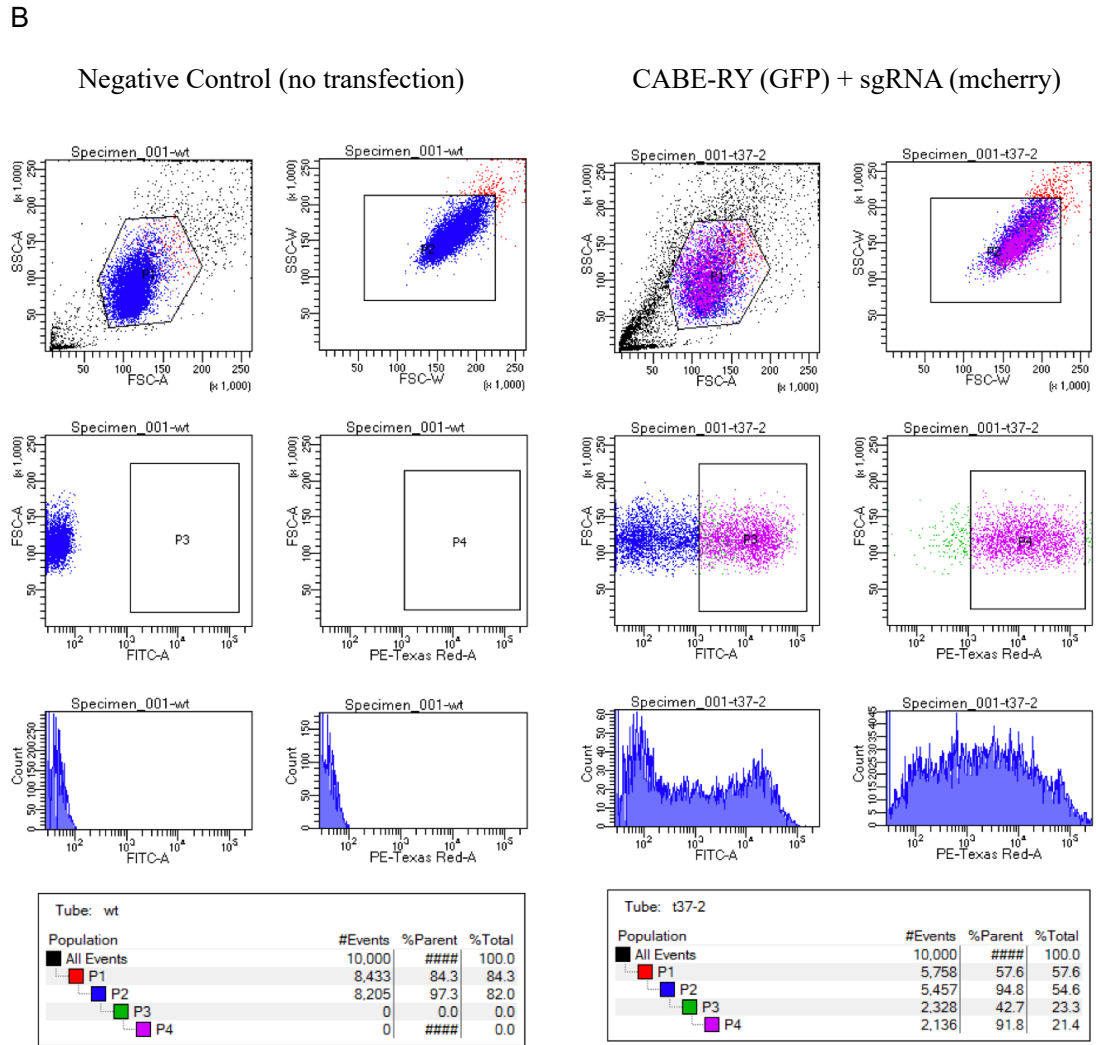

**Supplemental Figure 9. Profiles for transfection and FACS analysis.**

(A) Images of transfected HEK293T cells with fluorescence markers.

(B) FACS gating profiles for GFP- and mCherry-positive HEK293T cells.

**Supplementary Sequences 1.** DNA sequences used this study for cell transfection. Within base editor sequences, BPNLS sequences are highlighted in cyan, A3A(Y130F) sequences are in pink, TadA8e sequences are in yellow, linkers are in blue, SpRY are in red, UGIs are in tan, P2A sequences are in grey, EGFP sequences are in green and BSD sequences are in purple.

CABE-RY

```
atgaaacggacagccgacggaagcgagttcgagtcaccaagaagaagcggaaagtcGAGGCATCTCCAGCAAGCGG
ACCAAGGCACCTGATGGACCCACATCTTCACCTCTAACTTTAACAATGGCATCGGCA
GGCACAAGACATACCTGTGCTATGAGGTGGAGCGCCTGGACAATGGCACCAGCGTGA
AGATGGATCAGCACAGAGGCTTCTGCACAACCAGGCCAAGAATCTGCTGTGCGGCTT
CTACGGCCGGCACGCAGAGCTGAGATTCTGGACCTGGTGCCTAGCCTGCAGCTGGAT
CCAGCCCAGATCTATAGGGTGACCTGGTTCATCAGCTGGTCCCATGCTTTTCTGGGG
ATGTGCAGGAGAGGTGCGCGCCTTTCTGCAGGAGAACACACACGTGCGGCTGAGAAT
CTTCGCCGCCGGATCTTTGACTACGATCCTCTGTATAAGGAGGCCCTGCAGATGCTGA
GAGACGCAGGAGCCAGGTGTCCATCATGACCTACGATGAGTTCAAGCACTGCTGGG
ACACATTTGTGGATCACCAGGGCTGTCCCTTCCAGCCTTGGACGGACTGGATGAGCA
CTCCCAGGCCCTGTCTGGCAGGCTGAGGGCCATCCTGCAGAACCAGGGCAATGAGGC
CGCCGCCAAGGAAGCTGCCGCCAAGGAGGCCGCCGCCAAGtctgaggtggagtttccacgagfact
ggatgagacatgccctgacctggccaagagggcacgggatgagagggaggtgcctgtgggagccgtgctggtgctgaacaatagagt
atcggcgagggctggaacagagccatcgccctgcacgaccaacagccatgccgaaattatggcctgagacagggcgccctggtcat
gcagaactacagactgattgacgccaccctgtacgtgacattcgagcctgtcgtgatgtgcgccggccatgatccactctaggatcgcc
gctggtgtttggcTGAggaactcaaaaagagcgccgaggtccctgatgaactgctgaactaccccgcatgaatcaccgctc
gaaattaccgagggaaatcctggcagatgaatgtccgccctgctgtgcattctatcgatgcctagacaggtgttcaatgctcagaagaag
gcccagagctccatcaactctggagatctagcggagatcctctggcagcagacaccaggaacaagcagtcagcaacacagagag
cagtgccggcagcagcggcggcagcagcaagaagtacagcatcgccctggccatcgccaccaactctgtgggctgggcccgtgatcacc
acgagtacaaggtgccagcaagaattcaaggtgctgggcaacaccgaccggcacagcatcaagaagaacctgatcggagccctgctgt
tcgacagcggcgaacagccgagagaaccggctgaagagaaccgccagaagaatatacaccagacggaagaaccggatctgctatct
gcaagagatctcagcaacgagatggccaaggtggacgacagctcttccacagactggaagagctcctcctggtggaagaggataagaag
cacgagcggcaccccatctcggcaacatcgtggacgaggtggcctaccacgagaagtacccaccatctaccactgagaaagaactg
gtggacagcaccgacaagcccacactgoggtgatctatctggccctggccacatgatcaagttccggggccacttctgatcagggcg
acctgaaccccgacaacagcagctggacaagctgttcatccagctggtgcagacctacaaccagctgttcgaggaaccccatcaaccg
cagcggcgtggacgccaagccatctgtctgcccagactgagcaagagcagacggctgaaaaatctgatcggccagctcccggcgaga
agaagaatggcctgttcgaaacctgattgccctgagcctgggctgaccccaactcaagagcaacttcgacctggccgaggtatgcaa
actgcagctgagcaaggacacctacgacgacacctggacaacctgctggcccagatcggcgaccagctacggcactgtttctggccg
caagaacctgtccgaogccatctgctgagcgacatctgagagtgaaacaccagatcaccaaggccccctgagcgctctatgatcaag
agatacgacgagcaccaccaggacctgacctgctgaaagctctctgctggcagcagctgacctgagaagtacaaagagatftctcgacca
gagcaagaacggctacggcgctacattgacggcgagccagccaggaagagttctacaagttcatcaagcccatctggaaaagatgga
cggcaccgaggaactgctcgtgaagctgaacagagaggacctgctgcggaagcagcggaccttcgacaacggcagcatccccaccag
atccacctgggagagctgcacgccattctcggcggcaggaagattttaccattctgaaggacaaccggaaaaagatcgagaagatct
gacctccgcatcccctactactgctggccctctgccaggggaaacagcagattcgctggtgatgaccagaaagagcgaggaaccatcac
ccctggaaactcaggaagtggtgacaagggcgtctccgccagagcttcatcagcggatgaccaacttcgataagaacctgcccac
gagaaggtgctgccaagcacagcctgctgtacgagtctaccctgtataacgagctgaccaaaagtgaaatagtgaccgagggatga
gaaagccccttctgagcggcgagcagaaaaaggccatcgtggacctgctgttcaagaccaaccgaaagtaccgtgaagcagctga
aagaggactactcaagaaaatcgagtcttcgactcctggaatctccggcgtggaagatcggttcaacgcctcccctggcacataccac
gatctgctgaaaattatcaaggacaaggacttctgacaatgaggaacagaggacattctggaagatactgctgacctgacctgtttg
```

aggacagagatgatcgaggaacggctgaaacctatgccacctgttcgacgacaaagtatgaagcagctgaagcggcggagatac  
accggctggggcagggctgagccggaagctgatcaacggcatccgggacaagcagtcggcgaagacaatcctggattcctgaagtcggac  
ggcttcgccaacagaacttcatgacgtgatccacgacgacagcctgaccttaaaaggacatccagaaagcccaggtgtccggccagg  
gcatagcctgcacgagcacattgccaatctggccgagccccgcaftaagaaggcctctgcagacagtgaaagtggtggacgagc  
tcgtgaaagtgatggccggcacaagcccgagaacatcgtatcgaatggccagagagaaccagaccaccagaaggggacagaaga  
cagccgagagagaatgaagcggatcgaagaggcctcaagagctggcagccagatcctgaaagaacccccgtggaaaacaccag  
ctgcagaacgagaagctgtactgtactacctgcagaatggcgggatatgtacgtggaccaggaactggacatcaaccggctgtccgact  
acgatgtggaccatactgtgctcagagcttctgaggacgactccatcgaacaaggctgtgaccagaagcgacaagaaccggggcaa  
gagcgacaacgtgcccctccgaagaggtctgaagaagtgaagaactactggcggcagctgtgtaaccgcaagctgattaccagagaaa  
gttcgacaatctgaccaaggccgagagagcggcctgagcgaactggataagccggcttcatcaagagacagctgtgtgaaacccggc  
agatcacaagcacgtggcacagatcctggactcccgatgaactaagtacgacgagaatgacaagctgatccgggaaagtgaagtgat  
cacctgaaftcaagctgtgtccgattccggaaggttccagtttacaagtgccgagatcaacaactaccaccagcccacgacgc  
ctacgtgaacgccctgtgggaaccgcccctgatcaaaaagtacctaagctgaaagcgagttcgtgtacggcactacaaggtgtacgac  
gtcgggaagatgatgccaaagcggagcaggaatcggcaagctaccgccaagctctctctacgcaacatcatgaacttttcaagac  
cgagattaccctggccaacggcagatccggaagcggcctctgatcagacaaacggcgaacccgggagatcgtgtgggataaggcc  
gggattttgccaccgtcgggaaagtgtgagcatgccccagtgatatactgtaaaaagaccgaggtgcagacagcggcctcagcaag  
agtctatcagaccaagaggaacagcgataagctgatccagaaaagagactgggaccctaagaagctacggcggcttctgtgcca  
ccgtggcctattctgtgctggtggggccaaagtggaaaaggcaagtcgaagaactgaagagtgtaagagctgtggtggatccat  
catgaaaagaagcagctcagagaagaatccatcgaacttctggaagccaagggtacaaaagaagtgaaaaaggacctgatcaagctg  
cctaagctacccctgtcagctggaacccggcggagaagatctggcctctccaagcagctgcagaagggaacgaactggccctg  
ccctccaaatgtgaacttctgtacctggccagccactatgagaagctgaagggtcccccgaggataatgagcagaacagctgtttgtg  
gaacagcacaagcactacctggacgagatcagcagcagatcagcaggttccaagaagtatcctggccgacgctaacttgacaag  
tctgtccgctacaacaagcaccgggataagcccatcagagagcggcggagaatatacaccctgtttaccctgaccagactgggagc  
ccctagagcttcaagctactttgacaccaccatcgaccccaagcagctacagaagcaccaaagaggtgctggacgccaccctgatccaccag  
agcatcaccggcctgtacgagacacggatcgacctgtctcagctgggaggtgacagcggcgggagcggcgggagcggggggagcacta  
atctgagcgacatcattgagaaggagactgggaaacagctggtcattcaggagtcctatctgatgctgctgctgaggggtggaggaagtgatc  
ggcaacaagccagagctgtgacatcctgtgtgacaccgctacgacagtcacagatgagaatgtgatgctgtgacctgtgacgccccg  
agtataagccttggccctgtcatccagattcaacggcagaaataagatcaagatgctgagcggaggatccggaggatctggaggcag  
cacaacctgtgtgacatcagcagaagagacaggcaagcagctggtcatccaggagatcctgatgctgcccgaagaagctgaaga  
agtatcggaacaagcctgagagcagatcctgtccataccgctacgacgagagctaccgacgaaatgtgatgctgtgacatccgac  
gccccagagataagcctgggctctgtcatccaggattcaacggagagaaacaaaatcaaatgctgtctggcgctcaaaaagaaccg  
ccgacggcagcgaattcagcccaagaagaaggaaagtcGCTACTAACTTCAGCCTGCTGAAGCAGGCTG  
GAGACGTGGAGGAGAACCCTGGACCTATGCATATGGTGAGCAAGGGCGAGGAgtgttcac  
cggggtgtgcccactctgtcagctggacggcagctaaacggccacaagttcagctgtccggcagggcgagggcgatgccacct  
acggcaagctgacctgaagttcatctgaccaccggcaagctgcccgtgccctggcccacctctgaccacctgacctacggcgtgca  
gtcttcagccgtaccccgaccacatgaagcagcagacttctcaagtcgccatgcccgaaggctacgtccaggagcgcaccatctctt  
caaggacgacggcaactacaagaccgcccggaggtgaagttcgaggcgacaccctggtgaaccgatcagctgaagggatcagct  
tcaaggaggacggcaacatcctgggcccacaagctggagtacaactacaacagccacaacgtctatatcatggccgacaagcagaagaag  
gcatcaaAgtgaactcaagatccgccaacatcagggacggcagctgtcagctcggcaccactaccagcagaacacccccatcggc  
gacggccccgtgtgtgcccgacaaccctactgacccccagctccgctgagcaaaagacccaacgagaagcgcgatcactgtgtc  
ctgtgtgagttctgaccgcccgggatcaetctggcaTGGACGAGCTGTACAAGggatccggcgaacaaactctctc  
tctgaaacaagccggagatgcaagagaatcctggaccgatggccaagccttctcaagaagaatcaccctcattgaaagagcaacg  
gtacaatcaacagatccccatctgaaactacagctgcgacgagctctcttagcgacggccgatcttactggtgtcaatgtat  
atcatttactggggaccctgtgcagaactctgtgtgtggcactgtgtgtgtcggcagctggcaacctgacttctgtcgcgatcgg



aaatgagaacagggcatcttgagccccctgacggcaggtgccgacaggtgcttctgactgcatcctgggatcaaaagccatagtgaaagga  
agtgatggacagccgacggcagttgggaltctgaattgctgccctctggttatgtgtgggagggctaa

CABE2

atgaaacggacagccgacggaagcgagttcagtcaccaaaagaagaagcggaaagtcctgaggtggagttttcccacgagfactggatg  
agacatgccctgacctggccaagagggcacgggatgagagggaggtgcctgtgggagccgtgctggtgctgaacaatagagtatcgg  
cgagggctggaacagagccatcgccctgcacgacccaacagcccatgccaaattatggccctgagacagggcggcctggtcatgcaga  
actacagactgattgacgccacctgtacgtgacattcgagccttgcgtgatgtgcgccggccatgatccactctaggatcggccgctgg  
tgtttggcTGGaggaactcaaaaagagggcggcaggtccctgatgaacgtgctgaactacccggcatgaatcaccgctcgaatta  
ccgagggaatcctggcagatgaatgtccgccctgctgctgatttctatcggatgcttagacaggtgttcaatgctcagaagaaggcccag  
agctccatcaacGAGGCCGCCGCCAAGGAAGCTGCCGCCAAGGAGGCCGCCGCCAAGGAGG  
CATCTCCAGCAAGCGGACCAAGGCACCTGATGGACCCCCACATCTTACCTCTAACTT  
TAACAATGGCATCGGCAGGCACAAGACATACCTGTGCTATGAGGTGGAGCGCCTGGAC  
AATGGCACCAGCGTGAAGATGGATCAGCACAGAGGCTTCCTGCACAACCAGGCCAAG  
AATCTGCTGTGCGGCTTCTACGGCCGGCACGCAGAGCTGAGATTTCTGGACCTGGTGC  
CTAGCCTGCAGCTGGATCCAGCCCAGATCTATAGGGTGACCTGGTTCATCAGCTGGTCC  
CCATGCTTTTCTGGGGATGTGCAGGAGAGGTGCGCGCCTTTCTGCAGGAGAACACAC  
ACGTGCGGCTGAGAATCTTCGCCGCCGGATCTTTGACTACGATCCTCTGTATAAGGAG  
GCCCTGCAGATGCTGAGAGACGCAGGAGCCCAGGTGTCCATCATGACCTACGATGAGT  
TCAAGCACTGCTGGGACACATTTGTGGATCACCAGGGCTGTCCCTTCCAGCCTTGGGA  
CGGACTGGATGAGCACTCCAGGCCCTGTCTGGCAGGCTGAGGGCCATCCTGCAGAA  
CCAGGGCAATctggaggatctagcggaggatcctctggcagcgagacaccaggaacaagcagtcagcaacaccagagagca  
gtggcggcagcagcggcggcagcgacaagaagtacagcatcggcctggccatcggcaccactctgtgggctgggcccgtatcaccgac  
gagfacaaggtgccagcaagaattcaaggtgctggcaacaccgacggcagcagcatcaagaagaacctgatcggagccctgctgttc  
gacagcggcgaaacagccgagagaaccggctgaagagaaccgccagaagaagataccagacggaagaaccggatcgtctatctgc  
aagagatctcagcaacgagatggccaaggtggacgacagcttctccacagactggaagagtccttctggtggaagaggataagaagca  
cgagcggcaccctcttcggcaacatcgtggacgaggtggcctaccacgagaagtacccaccatctaccacctgagaagaactggtg  
gacagcaccgacaaggccgacctgcggtgatctatctggccctggccacatgatcaagttccggggccactcctgatcggggcgacc  
tgaaccccgacaacagcgacgtggacaagctgttcacagctggtgcagacctacaaccagctgttcgaggaaaacccatcaacgccag  
cggcgtggacccaagccatcctgctgccagactgagcaagagcagacggctggaaaatctgatcggccagctgcccggcgagaaga  
agaatggcctgttcgaaacctgattgccctgagcctggcctgacccccactcaagagcaacttcgacctggccgagatgccaaactg  
cagctgagcaaggacacctacgacgacacctggacaacctgctggccagatcggcgaccagctacggcactgtttctgcccgaag  
aacctgtccgacgccatcctgctgagcgacatctgagagtgaacaccgagatcacaaggccccctgagcgcctctatgatcaagagata  
cgacgagcaccaccaggacctgacctgctgaaagctctgctggcgagcagctgcctgagaagtacaagagattttctcgaccagagc  
aagaacggctacgccgctacatfgacggggagccagccaggaaggttctacaagttcatcaagccatcctggaaaagatggacggc  
accgaggaactgctcgtgaagctgaacagagagacctgctgcggaagcagcggaccttcgacaacggcagcatccccaccagatcca  
cctgggagagctgcacgccattctgcccggcaggaagattttaccattctgaaagacaaccgggaaaagatcgagaagatcctgacct  
tccgatcccctactacgtggccctctggccaggggaaacagcagatcgcctggatgaccagaagagcgaggaaacatcacccct  
ggaacttcgaggaagtggggacaaggcctccgccagagcttcacgagcggatgaccaactcgataagaacctgcccaacgaga  
aggtgctgcccagcacagcctgctgtacgagtactcaccgtgtataacgagctgaccaaagtgaatacgtgaccgaggggaatgagaaa  
gcccgcctctgagcggcgagcagaaaaagccatcgtggacctgctgttcaagaccaaccgaaaagtaccctgaagcagctgaaga  
ggactactcaagaaaatcagtgctcactccgtgaaatcctggcgtggaagatcggftcaacgctcctcctggccacataccagatct  
gctgaaaattacaaggacaaggactcctggacaatgaggaacgaggacattctggaagatcgtgctgacctgacactgtttgagga  
cagagagatgatcaggaaacggctgaaaacctatcccacctgttcgacgacaaaagtgatgaagcagctgaagcggcggagataccgg  
gctggggcaggctgagccggaagctgatcaacggcatccgggacaagcagctccggcaagacaatcctggattcctgaagtcgacggct

tcgccaacagaacttcagctgatccacgacgacgacctgacctttaaaggacatccagaaaagcccagggtgccggccaggggcga  
tagcctgcacgagcacaftgccaatctggccggcagccccgccattaagaagggcatcctgcagacagtgaaaggtggggagagctcgt  
gaaagtgatggccggcacaagcccagaaacatcgtgatcgaaatggccagagagaaccagaccaccagaagggacagaagaacag  
ccgcgagagaatgaagcggatcgaagaggcatcaaaagagctgggcaaccagatcctgaaagaacaccccgtgaaaaacaccagctg  
cagaacgagaagctgtacctgtactacctgcagaatgggcgggatgtacgtggaccaggaactggacatcaaccggctgtccgactacg  
atgtggaccatatactgctcagagctttctgaaggacgactccatcgacaacaaggtgctgaccagaagcgacaagaaccggggcaaga  
ggcacaacgtgccctccgaagaggtgctgaagaagatgaagaactactggcggcagctgctgaacccaagctgattaccagagaaggt  
tcgacaatctgaccaaggccgagagagggcggcctgagcgaactggataagccggctcatcaagagacagctggtgaaacccggcag  
atcacaagcagctggcacagatcctggactcccggatgaacactaagtagcagcagagaatgacaagctgattccgggaagtgaaaagtatca  
ccctgaagtccaagctggtgtccgattccggaaggattccagttttacaagtgccgagatcaacaactaccaccacgccacgacgct  
acctgaacgccgtggtggaaaccgccctgatcaaaaagtaccttaagctggaaagcgagttcgtgtacggcgactacaaggtgtacgactg  
gggaaagatgatcccaagagcagcagaaaatcgcaaggctaccccaagtacttcttacagcaacatcatgaacttttcaagaccg  
agattaccctggccaacggcgagatccggaagcggcctctgatcgagacaacggcgaaaccggggagatcgtgtgggataagggccg  
ggattttgccaccgtgcgaaagtgtgagcatgccccaaagtgaatactgtgaaaaagaccgaggtgcagacagcggcctcagcaaaaga  
gtctatcagaccaagaggaacagcgataagctgatcgccagaaaagagactgggaccctaagaagtacggcggcttctgtgcccac  
cgtggcctattctgtgctggtggggcacaaggtgaaaaagggcaagtccaagaaactgaagagtgtgaaagagctgctggggatcaccatc  
atggaaagaagcagcttcgagaagaatccatcgacttctggaagccaaggctacaagaagtgaaaaagacactgatcatcaagctgc  
ctaagtactccctgttcgagctggaaaacggccggaagagaatgctggcctctgccaagcagctgcagaagggaaacgaactggccctgc  
ctccaatatgtgaacttctgtacctggccagccacatgagaagctgaagggctccccgaggataatgagcagaacacagctgtttgtg  
aacgacacaagcactacctggacgagatcagcagcagatcagcaggttctcaagagagtgatcctggccgacgctaactgtgacaaaagt  
gctgtccgcctacaacaagcaccgggataagccccatcagagagcaggccgagaataatcaccactgtttaccctgaccagactggggacc  
cctagagcctcaagctgtgacaccaccatcgacccaagcagtagagaagcaccaaaagaggtgctggacgccaccctgatccaccaga  
gcataccggcctgtacgagacacggatgacctgtctcagctgggaggtgacagcggcgggagcggcgggagcgggggagcactaa  
tctgagcgacatcattgagaagagactgggaaacagctggtaactcaggagtcctcctgatgctgctgaggaggtggaggaaagtatgc  
gcaacaagccagagctgacatcctggtgcacaccgcctacgacgagtcacagatgagaatgtgatgctgctgacctctgacgccccga  
gtataagccttggccctggtcatccaggatttaacggcgagaataagatcaagatgctgagcggagatccggagatcggaggcagc  
accaacctgtctgacatcatcgagaaggagacaggcaagcagctggtcatccaggagagatcctgatgctgccgaagaagtgaagaa  
gtgatcgaaacaagcctgagagcgatctcgtgcataccgctacgacgagagtagcagaaaatgtgatgctgctgacatccgacg  
ccccagatfataagcctgggctctggtcatccaggattccaacggagagacaacaaatcaaaatgctgtctggcgctcaaaaagaaccgc  
cgacggcagcgaattcagcccaagaagaagaggaaagtcGCTACTAACTTCAGCCTGCTGAAGCAGGCTG  
GAGACGTGGAGGAGAACCCTGGACCTATGCATATGGTGAGCAAGGGCGAGGAgctgttca  
cgggggtgtgccatcctgtgctgagctggacggcgacgtaaacggccacaagttcagcgtgtccggcgagggcgagggcgatgccact  
acggcaagctgacctgaagttcatctgaccaccggcaagctgcccgtgccctggcccaccctctgaccaccctgacctacggcgtgca  
gtgctcagccgtaccggaccacatgaagcagcaogacttctcaagtcgccatccccgaaggctacgtccaggagcgcaccatcttct  
caaggacgacggcaactacaagaccgcgccgaggtgaagttcagggcgacaccctggtgaaccgcatcgagctgaaggcagcagct  
tcaaggagcagggcaacatcctggggcacaagctggagtacaactacaacagccacaacgcttatatcatggccgacaagcagaagaacg  
gcatcaaAgtgaactcaagatccgccacaacatcagggacggcagcgtgcagctcggcaccactaccagcagaacacccccatcggc  
gacggccccgtgctgctgcccgacaaccactacctgacaccagtcgccctgagcaaaagacccaacgagaagcgcgatcactgct  
ctgctggagttctgaccgccgggatcactctcgcaTGGACGAGCTGTACAAGgcatccggcgaacaacttctctc  
tctgaaacaagccggagatgctgaagagaatcctggaccatggccaagcctttgctcaagaagaatccacctcattgaaagagcaacg  
gctacaataacagcatccccatctgaaactacagcgtgcagcagctctctagcagcggccatcttactggtgcaatgtat  
atcatttactgggggacctgtgcagaactcgtggtgctggcactgctgctgctgcccagctggcaacctgacttctatgctgcgacatgg  
aaatgagaacagggcactctgagccccctggcagcgggtgccgacaggtgcttctcagatcctcctggatcaaaagccatagtgaaggac  
agtgatggacagccgacggcagttgggactgtgaattgctgccctctggtatgtgtggaggggctaa

CABE3

atgaaacggacagccgacggaagegagttcgagtcacaaagaagaagcggaaagtcGAGGCATCTCCAGCAAGCGG  
ACCAAGGCACCTGATGGACCCCCACATCTTACCTCTAACTTTAACAATGGCATCGGCA  
GGCACAAGACATACTGTGCTATGAGGTGGAGCGCCTGGACAATGGCACCAGCGTGA  
AGATGGATCAGCACAGAGGCTTCTGCACAACCAGGCCAAGAATCTGCTGTGCGGCTT  
CTACGGCCGGCACGCAGAGCTGAGATTTCTGGACCTGGTGCCTAGCCTGCAGCTGGAT  
CCAGCCCAGATCTATAGGGTGACCTGGTTCATCAGCTGGTCCCCATGCTTTTCTGGGG  
ATGTGCAGGAGAGGTGCGCGCCTTTCTGCAGGAGAACACACACGTGCGGCTGAGAAT  
CTTCGCCGCCGGATCTTTGACTACGATCCTCTGTATAAGGAGGCCCTGCAGATGCTGA  
GAGACGCAGGAGCCCAGGTGTCCATCATGACCTACGATGAGTTCAAGCACTGCTGGG  
ACACATTTGTGGATCACCAGGGCTGTCCCTTCCAGCCTTGGGACGGACTGGATGAGCA  
CTCCCAGGCCCTGTCTGGCAGGCTGAGGGCCATCCTGCAGAACCAGGGCAATtctggagga  
tctagcggaggatcctctggcagcgagacaccaggaacagcagtcagcaaacaccagagagcagtgccggcagcagcggcggcagc  
gacaagaagtacagcatcggcctggccatcggcaccaactctgtggcctggccctgatcaccgacgagtacaaggtgcccaaga  
tcaaggtgctgggcaacaccgaccggcacagcatcaagaagaacctgatcggagccctgctgttcgacagcggcgaacacggcagag  
aaccggctgaagagaaccgccagaagaatacaccagacggaagaaccggatctgctatctgcaagagatcttcaagaacgagatggc  
caaggtggacgacagcttctccacagactggaagatccttctgtggaagaggataagaagcagcagcggcaccctatctcggcaac  
atcgtggacgaggtggcctaccacgagaagtaccccaccatctaccacctgagaagaaactggtggacagcaccgacaagccgacctg  
cggtgatctatctggccctggcccatgatcaagttcggggccacttctgatcaggcggcactgaaaccccgacaacagcagctgg  
acaagctgttcatccagctgtgfcagacctacaaccagctgttcgaggaaaacccatcaacgccagcggcgtggacgccaaggccatcct  
gtctgccagactgagcaagcagacggctggaaaatctgatcgccagctgcccggcagagaagaagaatggcctgttcggaacctgatt  
gccctgagcctgggctgaccccaactcaagagcaacttcgacctggccgaggatgccaactgcagctgagcaaggacacctacgac  
gacgacctggacaacctgctggccagatcggcagaccagctacccgacctgtttctggccgccaagaacctgtccgacgccatcctgctga  
gagacatcctgagagtgaaacaccgagatcaccaaggccccctgagcgcctctatgatcaagagatacagcagcaccaccaggacctga  
ccctgctgaaagctctcgtcggcagcagctgctgagaagtacaaagagatfttctcaccagagcaagaacggctacccggctacatf  
gacggcggagccagccaggaagattctacaagttcatcaagccatctggaaaagatggacggcaccgaggaactgctcgtgaagctg  
aacagagaggacctgctcgggaagcagcggaccttcgacaacggcagcatccccaccagatccacctgggagagctgcacgccattct  
gcgcggcaggaagatfttaccattcctgaaggacaaccgggaaaagatcgagaagatcctgacctccgcatccctactactgtgggccc  
ctctgccaggggaaacagcagatfcgctggtgaccagaaaagcagaggaaaacatcacccctggaactcagaggaagtgtggac  
aaggcgcctccgcccagactcatcagcggatgaccaactcgataagaacctgcccaacgagaaggtgctcccaagcacagcctg  
ctgtacgagfacttaccgtgtataacgagctgaccaaaagtgaatactgaccgagggaatgagaaaagccccttctgagcggcagc  
agaaaaagccatcgtggacctgctgttcaagaccaaccgaaaagtaccgtgaagcagctgaaagaggactactcaagaaaatcagtg  
cttctgactccgtgaaatctccggcgtggaagatcgggttaacgcctccctgggcacataccacgatctgctgaaaattatcaaggacaagga  
cttctggacaatgaggaaaacgaggacattctggaagatactgctgacctgacactgttgaggacagagagatgatogaggaaacggc  
tgaaaacctatgccacctgttcagcacaagtgatgaagcagctgaagcggcggagatacaccggctggggcaggctgagccggaag  
ctgatcaacggcatccgggacaagcagtcgggcaagacaatctggtattctgaagtccgacggcttcgccaacagaacctcatgagct  
gatccagcagcagacctgaccttaagaggacatccagaagcccagggtgtccggccagggcgatagctgcacgagcacattgcaa  
ctggccggcagccccgccattaagaaggcatcctgcagacagtgaaggtggtggacgagctcgtgaaagtgatggccggcacaagc  
ccgagaacatcgtgatcgaatgccagagagaaccagaccaccagaagggacagaagaacagccgagagaaatgaagcggatcg  
aagaggcatcaaaagcgtggcagccagatcctgaaagaacaccccgtgaaaaacaccagctgcagaacgagaagctgtacctgact  
acctgcagaatggcgggatatgactgtgaccaggaactggacatcaaccggctgtccgactacgatgtgaccatactgtgctcagag  
cttctgaaggacgactccatcgacaacaaggtgctgaccagaagcgacaagaaccgggcaagagcagacaactgtccctccgaagagg  
tcgtgaagaagatgaagaactactggcggcagctgctgaacccaagctgattaccagagaagttcgacaatctgaccaagccgaga  
gaggcggcctgagcgaactggataaggccggctcatcaagagacagctggtgaaaacccggcagatcacaagcagctggcacaagc

ctggactcccggatgaacactaagtacgagagaatgacaagctgatccgggaagtgaagtgatcacctgaagtccaagctggtccg  
attfccggaaggattfccagttttacaaaagtgccgagatcaacaactaccaccacgccacgacgctfacctgaacgccgctggtggaacc  
gccctgatcaaaaagtacctaagctggaaagcgagttcgtgacggcgaactacaaggtgtacgacgtgcggaagatgatgccaaagagcg  
agcaggaaatcggcaaggctaccgccaagtacttctctacagcaacatcatgaacttttcaagaccgagattaccctggccaacggcgaga  
tccggaagcggcctctgatcgagacaaacggcgaaaccggggagatcgtgtgggataaggccgggattttgccaccgtgcggaagt  
ctgagcatgcccgaagtgaatatcgtgaaaaagaccgaggtgcagacagggcgttcagcaaaagagtctatcagaccaagaggaacagc  
gataagctgatccagaaaagaaggactgggaccctaaagaagctggcggccttctgtggcccaccgtggcctattctgtgctggtggtggc  
caaagtggaaaaggcaagccaagaactgaagagtgtaaaagagctgctgggatcacatcatgaaagaagcagcttcgagaaga  
atcccatcgactttcgaagccaaggctacaagaagtgaaaaaggacctgatcatcaagctgcctaagtaactccctgttcgagctggaaa  
acggccggaagagaatctggcctctgccaagcagctgcagaaggaaacgaactggcctgcctccaaatatgtgaactcctgtacct  
ggccagccactatgagaagctgaaggctccccgagataatgagcagaacagctgtttgtggaacagcacaagcactacctggcga  
gatcatcgagcagatcagcaggttctccaaagagtgatctggccgacgctaactggacaaaagtctgtccgctacaacaagcaccgg  
gataagccatcagagagcagggcgaataatcatccacctgttaccctgaccagactgggagcccctagagcctcaagactttgacacc  
accatcgacccaagcagctacagaagcaccaaagaggtgctggacgccacctgatccaccagagcatcaccggcctgtacgagacag  
gatcgacctgtctcagctgggaggtgactctggaggatctagcggaggatcctctggcagcgagacaccggaacaagcagctcagcaac  
accagagagcagtgccggcagcagcggcggcagctctgaggtggagttttccacgagactggtgagacatgccctgacctggccaa  
gaggcacgggatgagagggaggtgctgtgggagccgtgctgtgctgaacaatagatgatcggcagggctggaacagagccatc  
ggcctgcacgaccaacagcccatgccgaaatfatggcctgagacagggcggcctggtcatgcagaactacagactgattgacgccac  
ctgtactgacattcgagccttgcgtgatgtgcgccggcgcctgatccactctaggatggccgctggtgtttggcTGGaggaactcaa  
aaagagggcggcaggtcctgatgaactgctgaactacccccggatgaatcaccgctcgaatfaccgagggaaatcctggcagatg  
aatgtccgcccctgtgtgcatttctatcgatgcctagacaggtgtcaatgctcagaagaaggcccagagctcatcaacagcggggg  
agcggcgggagcggggggagcactaatctgagcgacatcattgagaaggagactgggaaacagctggtcattcaggagctcatcctgatg  
ctgctgagggaggtggaggaagtgatcggcaacaagccagagctgtacatcctggtgcacaccgctacgacagctccacagatgagaat  
gtgatgctgtgacctctgacccccgagfataagccttggccctggtcatccaggatfctaaccggcagagaataagatcaagatgctgagc  
ggaggatcggaggatctggaggcagcaccacctgtctgacatcfcgagaaggagacaggcaagcagctggtcatccaggagagcat  
cctgatgctgcccgaagaagtcgaagaagtgatcggaaacaagcctgagagcgatatacctggtccataaccgctacgagagataccgac  
gaaaatgtgatgctgacatccgacccccagatataagccttggcctctgtgatccaggattccaacggagagaacaaaatcaaaat  
gctgtctggcggctcaaaaagaaccgccagcggcgaatfcagcccaagaagaagaggaaagtcGCTACTAACTTCAG  
CCTGCTGAAGCAGGCTGGAGACGTGGAGGAGAACCCTGGACCTATGCATATGGTGAG  
CAAGGGCGAGGAgtgttaccggggtggtgccatcctggtcagctggacggcagcgaacggccaagaattcagcgtgt  
ccggcagggcgagggcgatgccacctacggcaagctgacctgaagttcatctgcaccaccggcaagctgcccgtgcctggcccacc  
ctcgtgaccacctgacctacggcgtcagtgctcagccgctaccccaccacatgaagcagcagacttctcaagtcgccatgccga  
aggctactccaggagcaccatcttcaagcagcagcgaactacaagaccgcccggaggtgaagttcagggcgacacctggt  
gaaccgcatcgagctgaaggcagcacttcaaggaggacggcaacatcctggggcacaagctggagtacaactacaacagccacaacg  
tctatcatgcccgacaagcagaagaacggcatcaaAgtgaactcaagatccgccacaacatcaggacggcagcgtgcagctgccc  
accactaccagcagaacacccccatcggcgacggccccgtgctgctgcccgaaccactacctgagcaccagtcgccctgagcaaa  
accacaacgagaagcgcgatcatatggtcctgtgagttcgtgaccgccgggatcactctggcaTGGACGAGCTGTAC  
AAGggatccggcgaacaaacttctctgctgaaacaagccggagatgtcgaagagaatcctggaccgatggccaagcctttgtctcaa  
gaagaatccacctcattgaaagagcaacggctacaatcaacagcatccccatctgaagactacagcgtgccagcgagctctcttag  
cgacggccgcatctcactggtgtaatgtatcatcttctctggggacctgtgcagaactcgtggtgctgggactgctgctgctggca  
gctggcaacctgactgtatcgtcgcgatcggaaatgagaacaggggactcttggccccctggcagcgtgccgacaggtgctctcagat  
gcatcctgggatcaaaagccatgtaaggacagtgatggacagccagcggcagttgggattcgtgaattgctccctctggtatgtggga  
gggctaa

CABE4

atgaaacggacagccgacggaagcgagttcgagtcacaaagaagaagcggaaagtcctgaggtggagtttcccacgagctactgtagt  
agacatgccctgacctggccaagaggcaggggatgagaggggaggtgcctgtgggagccgtgctggtgctgaacaatagagtatcgg  
cgagggtggaacagagccatcgccctgcacgaccaacagcccatgccgaattatggccctgagacagggcggcctggtcatgcaga  
actacagactgattgacccacctgtactgtacatfcagccttgcgtgatgtcgcggcggccatgatccactctaggatcggccgctgg  
tgtttggcTGGaggaactcaaaaagggcggcggcaggctccctgatgaacgtgctgaactacccggcatgaatcaccgctgcaaatta  
ccgagggaatcctggcagatgaatgtccgccctgctgtcgcatttctatcgatgacctagacaggtgtcaatgctcagaagaaggcccag  
agctccatcaactctggaggatctagcggaggatcctctggcagcgagacaccaggaacaagcgagtcagcaacaccagagagcagtg  
cggcagcagcggcggcagcgacaagaagtacagcatcgccctggccatcggcaccactctgtgggctgggcccgtgatcaccgacgag  
acaaggtgcccaagaatcaaggtgctggcaacaccgaccggcagcagcatcaagaagaacctgatcggagccctgctgttcgaca  
ggcggaacagccgagagaacccggctgaagagaaccgccagaagaagatacaccagcggagaacccgatctgctatctgcaaga  
gatctcagcaacgagatggccaaggtggacgacagcttccacagactggaagagctctcctggggaagagataagaagcacgag  
cggcaccatctcggcaacatcgtggacgaggtggcctaccacgagaagtaccccacatctaccactgagaagaactggtggaca  
gcaccgacaagccgacctgggctgatctatctggccctggcccacatgatcaagttcggggccacttctgatcaggggcacctgaa  
ccccgacaacagcagctggacaagctgttcatccagctgtgagacctaaccagctgttcgaggaaaacccatcaaccgacgg  
cgtggacgccaagccatcctgtctgcccagactgagcaagagcagacggctggaaaatctgatcggccagctggccggcagaagaaga  
atggcctgttcggaacctgattgccctgagcctgggctgacccccactcaagagcaactcagctggccgaggatgccaactgcag  
ctgagcaaggacacctacgacgacacctggacaacctgtggcccagatcggcgaccagctgcttctggccgccaagaac  
ctgtcogacgccatcctgctgagcagatcctgagatgaacaccgagatcacaagggccccctgagcgcctctatgatcaagagatac  
acgagcaccaccagacctgacctgctgaaagctctcgtcggcagcagctgcctgagaagtacaagagatfttctgaccagagcaa  
gaacggctacggcctacattgacggcggagccagccaggaaggtctacaagttcatcaagccatcctggaaaagatggacggc  
cgaggaaactgctcgtgaagctgaacagagaggacctgctcggaaagcagcggaccttcgacaacggcagcatccccaccagatccac  
tgggagagctgcacgccattctcggcggcaggaagatftttaccattcctgaaggacaaccgggaaaagatcgagaagatcctgacctc  
cgatccccctactactgtggccctctggccaggggaacagcagatcgcctgtagaccagaaagagcgaggaaaccatccccctgg  
aacttcgaggaaagtgtggacaagggcgttcccccagagcttcatcagcggatgaccaacttcgataagaacctgccaacgagaag  
gtgctgcccaagcacagcctgctgtacgagtacttaccgtgataacgagctgaccaagtgaatacgtgaccgagggaatgagaaagc  
ccgcttctgagcggcagcagaaaaaggccatcgtggacctgctgtcaagaccaaccggaaaagtaccgtgaaagcagctgaaagag  
gactactcaagaaaatcgagtctcactcctggaaatctccggcgtggaagatcggttcaacgcctccctgggcacataccacgatctg  
ctgaaaatfatcaaggacaaggacttctggacaatgaggaaaacgaggacattctggaagatacgtgctgacctgacactgtttgaggac  
agagagatgatcgaggaaacggctgaaaacctatgccacctgtcagcacaaggtgatgaagcagctgaagcggcggagatacaccgg  
ctggggcagcctgagccggaagctgatcaacggcatccgggacaagcagtcggcaagacaatctgatttctgaagtcggacggctt  
cgccaacagaaactcatgcagctgatccacgacgacagcctgaccttaagaggacatccagaagcccaggtgtccggccaggcgat  
agcctgcacgagcacattgccaatctggccggcagccccgccattaagaagggcatcctgcagacagtgaaaggtgtggacgagctcgtg  
aaagtatgggcccggcacaagcccgagaacatcgtgatgaaatggccagagagaaccagaccaccaagaagggacagaagaacagcc  
gggagagaatgaagcggatcgaagaggcatcaagagctggcagccagatcctgaaagaacaccccgtgaaaacacccagctgca  
gaacgagaagctgtacctgtactacctgcaaatggcgggataatgtactgtggaccaggaactggacatcaaccggctgtccgactacgat  
gtggaccatactgctcctcagagcttctgaaggacgactccatcgacaacaaggtgctgaccagaagcgacaagaacccgggcaagagc  
gacaacgtgccctccgaagaggtcgtgaagaagatgaagaactactggcggcagctgctgaacgccaagctgattaccaagaaagttc  
gacaatctgaccaagcccagagagggcggcctgagcgaactggataagccggccttcatcaagagacagctgggtgaaacccggcagat  
cacaagcacgtggcacagatcctggactccccgatgaactactaagctgacgagaaatgacaagctgatccgggaagtgaagtgatcac  
ctgaaatcaagctggtgtccgatttccggaaggttccagttttacaaagtgcgcgagatcaacaactaccaccagcccacgacgccta  
cctgaacgccctgtgggaaaccgctgatcaaaaagtacctaagctgaaaagcagttcgtgtacggcactacaaggtgtacgacctg  
cggaaatgatcgccaagagcagcaggaatcggcaaggtaccgccaagcttctctacagcaacatcatgaacttttcaagaccga  
gattacctggccaacggcagatccggaagcggcctctgatcgagacaacggcgaacccggggagatcgtgtgggataaggccgg

gattttgccaccgtgcggaaagtgctgagcatgcccgaagtgaatatcgtgaaaaagaccgaggtgcagacaggcggcttcagcaaagagt  
ctatcagaccaagaggaacagcgataagctgafccagaaaagagactgggaccctaagaagtacggggcttctctgtggcccaccg  
tgccctattctgtgctgggtggccaaagtggaaaaggcaagtccaagaactgaagagtgtgaaagagctgctgggatcaccatcatg  
gaaaagaagcagctfcgagaagaatcccatcgaactttctggaagccaaggctacaaaagaagtgaaaaaggacctgatcatcaagctgccta  
agtactccctgttcgagctggaaaacggccggaagagaatgctggcctctgccaagcagctgcagaagggaacgaactggcctgcct  
ccaaatatgtgaacttctgtacctggccagccactatgagaagctgaagggctccccgaggataatgagcagaacagctgtttgtggaac  
agcacaagcactacctggacgagatcatcagcagatcagcgagttctccaagagagtgatcctggccgacgctaacttgacaaaagtgt  
gtccgcctacaacaagcaccgggataagcccatcagagagcaggccgagaatatcatccacctgttacctgaccagactgggagccct  
agagccttaagtactftgacaccacatcagcccgaagcagfacagaagcaccaaaagggtgctggacgccacctgatccaccagagca  
tcaccggcctgtacgagacacggatcgaactgtctcagctgggaggtgactctggaggatctagcggaggatcctctggcagcgagacacc  
aggaacaagcagtcagcaacaccagagagcagtgccggcagcagcggcggcagcGAGGCATCTCCAGCAAGCGG  
ACCAAGGCACCTGATGGACCCCCACATCTTCACCTCTAACTTTAACAATGGCATCGGCA  
GGCACAAGACATACCTGTGCTATGAGGTGGAGCGCCTGGACAATGGCACCAGCGTGA  
AGATGGATCAGCACAGAGGCTTCTGCACAACCAGGCCAAGAATCTGCTGTGCGGCTT  
CTACGGCCGGCACGCAGAGCTGAGATTTCTGGACCTGGTGCCTAGCCTGCAGCTGGAT  
CCAGCCCAGATCTATAGGGTGACCTGGTTCATCAGCTGGTCCCCATGCTTTTCTGGGG  
ATGTGCAGGAGAGGTGCGCGCCTTTCTGCAGGAGAACACACACGTGCGGCTGAGAAT  
CTTCGCGGCCCGGATCTTTGACTACGATCCTCTGTATAAGGAGGCCCTGCAGATGCTGA  
GAGACGCAGGAGCCCAGGTGTCCATCATGACCTACGATGAGTTCAAGCACTGCTGGG  
ACACATTTGTGGATCACCAGGGCTGTCCCTTCCAGCCTTGGGACGGACTGGATGAGCA  
CTCCCAGGCCCTGTCTGGCAGGCTGAGGGCCATCCTGCAGAACCAGGGCAATagcggcgg  
gagcggcgggagcgggggggagcactaatctgagcgacatcattgagaaggagactgggaaacagctggtcattcaggagtccatcctgat  
gctgcctgaggaggtggaggaagtgatcggcaacaagccagagtctgacatcctggtgcacaccgctacgacgagtccacagatgagaa  
tgtgatgctgctgacctctgacgccccagataagccttgggcccctggtcatccaggattctaacggcgagaataagatcaagatgctgag  
cggaggatccggaggatctggaggcagcaccacctgtctgacatcatcgagaaggagacaggcaagcagctggtcatccaggagagca  
tctgatgctgcccgaagaagtgaagaagtgatcggaaacaagcctgagagcgatctcctggtccataaccgctacgacgagagtaccga  
cgaaaatgtgatgctgctgacatccgacccccagataagccttgggctctggtcatccaggattccaacggagagaaacaaaatcaaaa  
tgctgctggcggctcaaaaagaaccgacggcagcgaattcgagcccagaagaagaggaaagtcGCTACTAACTTACG  
CCTGCTGAAGCAGGCTGGAGACGTGGAGGAGAACCCTGGACCTATGCATATGGTGAG  
CAAGGGCGAGGAgctgttaccggggtggtgccatcctggtcagctggacggcagcgtaacggccacaagttcagcgtgt  
ccggcagggcgaggcgatgccacctacggcaagctgacctgaagttcatctgcaccaccgcaagctgcccgtgcccctggcccacc  
ctcgtgaccacctgacctacggcgtgagtgctcagccgctaccccaccacatgaagcagcagacttctcaagtcgccatgccga  
aggctactcaggagcgcaccatcttctcaaggacgacggcaactacaagaccgcccggaggtgaagttcaggggcagaccctggt  
gaaccgcatcgagctgaagggcatcgaactcaaggaggacggcaacatcctggggcacaagctggagtacaactacaacagccacaagc  
tctatcatgcccgaagaagcagaagaacggcatcaaAgtgaactcaagatccgccacaacatcaggacggcagcgtgcagctgccc  
accactaccagcagaacacccccatcggcgacggccccgtgctgctgcccgaaccactacctgagcaccagtcgccctgagcaaa  
accacaacgagaagcgcgatcacatggtcctgctggagttcgtgaccgcccgggatactctggcaTGGACGAGCTGTAC  
AAGggatccggcgcaacaaacttctctgctgaaacaagccggagatgtcgaagagaatcctggaccgatggccaagcctttgtctcaa  
gaagaatccacctcattgaaagagcaacggctacaatcaacagcatccccatctgaaactacagcgtgccagcgcagctctctctag  
cgacggccgcatctcactggtgtaatgtatcatcttactgggggacctgtgcagaactcgtggtgctgggactgctgctgctggcca  
gctggcaacctgactgtatcgtcgcgatcggaaatgagaacaggggactcttgaccctcgggacgggtgccgacaggtgcttctcagct  
gcatcctgggatcaaacgatagtgaaggacagtgatggacagccagcggcagttgggattcgtgaattgctccctctggtatgtgtgga  
gggctaa

**Supplemental Table 1. sgRNA sequences.**

| <b>Number</b> | <b>Site</b> | <b>Protospacer sequence</b> |
|---------------|-------------|-----------------------------|
| 1             | NGG SITE 1  | GAACACAAAGCATAGACTGC        |
| 2             | NTT SITE 1  | ACATCATCAGATATTCTGCA        |
| 3             | NTC SITE 1  | GCTGCAAACAAGTGCAGAAT        |
| 4             | NTG SITE 1  | TGGCAGGACGTCTGCCCAAT        |
| 5             | NAC SITE 1  | ACCAACAATAGAGGCCCAT         |
| 6             | NAG SITE 1  | GTTTACATAAAAGATCTTCA        |
| 7             | NGT SITE 1  | AATACAAATAGTTAAGAACA        |
| 8             | NGC SITE 1  | CTGGAACACAAAGCATAGAC        |
| 9             | NCT SITE 1  | TCCTAAACCAGTGTGAGGGA        |
| 10            | NCC SITE 1  | AAAGATCTTCACAGGCTACC        |
| 11            | NCG SITE 1  | CCAACAATAGAGGCCCATTA        |
| 12            | NAT SITE 1  | CTGTCAAACCTGTGCGTATGA       |
| 13            | NAA SITE 1  | TACCAACAATAGAGGCCCAT        |
| 14            | NCA SITE 1  | CTGCAGCCCAAGCCTCAGTG        |
| 15            | NGA SITE 1  | AGGTCCTAAACCAGTGTGAG        |
| 16            | NTA SITE 1  | CTACCAACAATAGAGGCCCA        |
| 17            | NTT SITE 2  | GACAGTTCCTTCCAATTCCA        |
| 18            | NTC SITE 2  | AACAACAGTACTTGCGACAG        |
| 19            | NTG SITE 2  | GCAGCAGCCTGGAAAAGTAC        |
| 20            | NGT SITE 2  | TTGGAACCTCCTGCTTGCAAG       |
| 21            | NGC SITE 2  | AAGGCCAAGCTTGCCTGCCC        |
| 22            | NCC SITE 2  | GAGATGCAGCGAATGTGAAA        |
| 23            | NCT SITE 2  | TCATCTTAGGCCTTCAAGGA        |
| 24            | NGG SITE 2  | CCTGCCCTGCATTTTATCAA        |
| 25            | NCG SITE 2  | GAGCAGGGAAGAAGGAATCA        |
| 26            | NAT SITE 2  | TACTTGCGACAGTTCCTTCC        |
| 27            | NAC SITE 2  | CATTTCCCTCTACGCTCGCT        |
| 28            | NAG SITE 2  | TTGAACAACAGTACTTGCGA        |
| 29            | NAA SITE 2  | CCTGCTTGCAAGTGCAACC         |
| 30            | NCA SITE 2  | GATGCAGCGAATGTGAAATC        |
| 31            | NGA SITE 2  | GAAAAGTACTTGGGGACCAA        |
| 32            | NTA SITE 2  | CCTCTTCTGGAAAGGGGTAC        |
| 33            | NTT SITE 3  | CTTAGGGGGCACTTCGACCA        |
| 34            | NTC SITE 3  | TCCACCCGCTGTGCGTCCCA        |
| 35            | NTG SITE 3  | TGGCCGAATGCAAAGGTTCT        |
| 36            | NGT SITE 3  | TCGGCCAATGGGGCACAAGG        |
| 37            | NGC SITE 3  | CCCAAAGTGGGGCGTACA          |
| 38            | NCC SITE 3  | GAGTTCCACCCGCTGTGCGT        |
| 39            | NCT SITE 3  | TGGACTCAGATGCTCCAACG        |
| 40            | NGG SITE 3  | GGTTACACCAAAGGGCTAGA        |

|    |            |                       |
|----|------------|-----------------------|
| 41 | NCG SITE 3 | ATGCAAAGGTTCTCTGCTAG  |
| 42 | NAT SITE 3 | GTAACCTCCCTTGAAAGGGG  |
| 43 | NAC SITE 3 | GGAGCATCTGAGTCCAGGGG  |
| 44 | NAG SITE 3 | ACAGCGGGTGGA ACTCCCAA |
| 45 | NAA SITE 3 | CTGCTAGACGACAGCGCAGG  |
| 46 | NCA SITE 3 | TGCGTCCCACTCCTTGTGCC  |
| 47 | NGA SITE 3 | GAATGCAAAGGTTCTCTGCT  |
| 48 | NTA SITE 3 | CCGAATGCAAAGGTTCTCTG  |
| 49 | DEFB132    | ATTATGATGTTACGGTCGTT  |
| 50 | KRT4       | AGGTGCAGTTCTTAGAGCAA  |
| 51 | LRIT3      | ACATTGACGTGGAATATGAT  |
| 52 | OVGP1      | CATGGTCATTGCCCCAGTGA  |
| 53 | PYROXD2    | ATAGGGCATGTACTGAGTGA  |
| 54 | SEC16B     | TGGTGCATGTAGGTCCCAGC  |
| 55 | TGFBR3     | TTGGTCATTGT CATAGATCT |
| 56 | WDR90      | CCTGTGCAGGGGTGGCTCAC  |
| 57 | MAP4       | CCTGTGACGGTTTCTAAAGG  |
| 58 | SYNM       | AGGGGCAGGGTGGGCCGGGG  |



**Supplemental Table 2. pegRNA sequences.**

| <b>pegRNA</b>        | <b>spacer sequence</b> | <b>3' extension sequence</b> | <b>PBS length(nt)</b> | <b>RT template length(nt)</b> |
|----------------------|------------------------|------------------------------|-----------------------|-------------------------------|
| DEFB132              | CAGTGGTTATTATGATGTTA   | ACAAACGACCACAACATCATAATAA    | 13                    | 12                            |
| KRT4                 | GCTGGTGCCTTTATCAACAC   | CTCTAAGAACCACACCTGTGTTGAT    | 13                    | 12                            |
| LRIT3                | AAGAGAGTGTGACATTGACG   | CATATTCCACACCAATGTCACACTC    | 13                    | 12                            |
| OVGP1                | AGAGAAGACTGAGATCACTG   | AAGTCATGGTTGTTGCCCCAGTGAT    | 13                    | 12                            |
| PYROXD2              | TTGCCTCCAGCCAGCGTATA   | ACTCAGTACACACCCTATACGCTGG    | 13                    | 12                            |
| SEC16B               | TTTCGGGCCAGGAGGTCAGC   | GGGACCTACACACACCAGCTGACCT    | 13                    | 12                            |
| TGFBR3               | AATGTCATCTCTTATTGATT   | TCTATGACAACAACCAATCAATAA     | 13                    | 12                            |
| WDR90                | ACGGAAGGTTGTCCCTGTGC   | GAGCCACCCCCACACAGGGACAACC    | 13                    | 12                            |
| MAP4                 | CTTTTCCCGTTCTCTGTGA    | TTTAGAAACCACCACAGGAACGGGG    | 13                    | 12                            |
| SYNM                 | TGTCGCCCTCACCAGAGAG    | CGGCCACCCACCCTCTCTGGTG       | 13                    | 12                            |
| <b>nicking sgRNA</b> | <b>spacer sequence</b> |                              |                       |                               |
| DEFB132              | AACCACTGGCAATCAAGGAG   |                              |                       |                               |
| KRT4                 | TGGTCGTCTGCTGCTGGAGC   |                              |                       |                               |
| LRIT3                | CAGGTCCTTCCCACCATACT   |                              |                       |                               |
| OVGP1                | AGGGATACAGTTTCCTTTGT   |                              |                       |                               |
| PYROXD2              | TTCTCGCTGGACCCACCC     |                              |                       |                               |
| SEC16B               | CATGCTGTGCAGTTCAACAA   |                              |                       |                               |
| TGFBR3               | GAATCTGGTGAAGTGGGCTT   |                              |                       |                               |
| WDR90                | CCAGGTCAGACTGTCCTCTC   |                              |                       |                               |
| MAP4                 | GATTCTGTGTTAGAAAAACT   |                              |                       |                               |
| SYNM                 | CGGAACTGCCACCAGCACCC   |                              |                       |                               |

**Supplemental Table 3. Primer sequences.**

| Site       | Forward sequence (5'-3') | Reverse sequence (5'-3') |
|------------|--------------------------|--------------------------|
| NGG SITE 1 | ATAACAAGACCTGGCTGAGC     | TCAAGCAGGTGATTACAGGA     |
| NTT SITE 1 | CAGCATGTGGTAATTTTCCA     | CACATGACAGTTAAGGTTTG     |
| NTC SITE 1 | CAAGACCTGGCTGAGCTAAC     | TTTAGTCTTTCAAGCAGGTG     |
| NTG SITE 1 | AGGCTACCCCCTAAGTCTAG     | GTTTCCTTTACAGGGCCAGC     |
| NAC SITE 1 | GATCTTCACAGGCTACCCCC     | CCACATGCTGTCACAGTTAG     |
| NAG SITE 1 | GCAGTGTTTAGAAGGAGACT     | GTTGGTAGAATGGCAGTGCA     |
| NGT SITE 1 | GGCCCTGTAAAGGAACTGG      | TGTTTAGTCTTTCAAGCAGG     |
| NGC SITE 1 | ATGATAACAAGACCTGGCTG     | TCTTTCAAGCAGGTGATTAC     |
| NCT SITE 1 | AGAAGGAGACTTGTGCACAT     | ATTGTTGGTAGAATGGCAGT     |
| NCC SITE 1 | GTTTAGAAGGAGACTTGTGC     | GGTAGAATGGCAGTGCAATA     |
| NCG SITE 1 | AAAGATCTTCACAGGCTACC     | CCAGCGGGCTGGAAAATTAC     |
| NAT SITE 1 | ATGTGGTAATTTTCCAGCCC     | CAAGCACATGACAGTTAAGG     |
| NAA SITE 1 | CTTCACAGGCTACCCCCTAAG    | GAAAATTACCACATGCTGTC     |
| NCA SITE 1 | CCTAAACCAGTGTGAGGGAG     | TGCTTTGTGTTCCAGTTTCC     |
| NGA SITE 1 | GGAGACTTGTGCACATTCTA     | TCTATTGTTGGTAGAATGGC     |
| NTA SITE 1 | CACAGGCTACCCCCTAAGTC     | GGCTGGAAAATTACCACATG     |
| NTT SITE 2 | GTGGAACATGGTGAAGTCTT     | TAGCAGAGGAATCAGGCAAG     |
| NTC SITE 2 | ACACTGCAATGTTTTTGTGG     | AGGCAAGAAATAAGCAACTC     |
| NTG SITE 2 | GTGGAGATGCAGCGAATGTG     | GAAAAGCACTCACCATGTTC     |
| NGT SITE 2 | GAGGAGTAGCCAAAGACCAT     | TCCATAACAAAAGGAAGCAC     |
| NGC SITE 2 | TGAACCCTCTTCTGGAAAGG     | CTGTTGTTCAAAGTTCCTTG     |
| NCC SITE 2 | GTGCTTCCTTTTGTATGGA      | GATTCCTTCTCCCTGCTCC      |
| NCT SITE 2 | ATGGGGTCCCACTGCAAT       | CCGAAGTCACGAAGTAACTT     |
| NGG SITE 2 | CTCTTCTGGAAAGGGGTACC     | GTCGCAAGTACTGTTGTTCA     |
| NCG SITE 2 | CTGGAAAGGGGTACCTATTA     | TTGGAAGGAACTGTGCAAG      |
| NAT SITE 2 | TGTTTTGTGGAACATGGTG      | GAATCAGGCAAGAAATAAGC     |
| NAC SITE 2 | GACTTGTGAGATGCAGCGA      | CACTCACCATGTTCCACAAA     |
| NAG SITE 2 | GGTCCCACTGCAATGTTTT      | ATAAAGCCGAAGTCACGAAG     |
| NAA SITE 2 | GAGTAGCCAAAGACCATCAG     | CTTCCATAACAAAAGGAAGC     |
| NCA SITE 2 | GCTTCCTTTTGTATGGAAG      | GATGATTCTTCTCCCTGC       |
| NTA SITE 2 | CTTGTGGAGATGCAGCGAAT     | AAGCACTCACCATGTTCCAC     |
| NGA SITE 2 | AGATCTGAACCCTCTTCTG      | GTTCAAAGTTCCTTGAAGGC     |
| NTT SITE 3 | AGGAAGCAGTATCCGAAGGC     | CCAATGGGGCACAAGGAGTG     |
| NAC SITE 3 | CAGTATCCGAAGGCAGCAGC     | CATTCGGCCAATGGGGCACA     |
| NGC SITE 3 | ACAATTACTTAGGGGGCACT     | ACTCAGCAGTATCTTCAGTG     |
| NAG SITE 3 | TACTTAGGGGGCACTTCGAC     | AAGGGGAATACTCAGCAGTA     |

|            |                       |                      |
|------------|-----------------------|----------------------|
| NGT SITE 3 | GGCACTTCGACCATTTCTGA  | TATCTTCAGTGCTCTTGCCT |
| NCT SITE 3 | GACAACGCCAAGGAGTTGTG  | AGCCCTTTGGTGTAACCTCC |
| NCC SITE 3 | CGCCAAGGAGTTGTGTAAGG  | TCTCGCCTTCTAGCCCTTTG |
| NTC SITE 3 | GGAGTTGTGTAAGGCAGTGT  | CCTAGGCTCTCGCCTTCTAG |
| NCA SITE 3 | ACCATTTCTGACAACGCCAA  | TTTGGTGTAACCTCCCTTGA |
| NTA SITE 3 | CGTTGGAGCATCTGAGTCCA  | GACGGCAGTTCAAGTGTCCT |
| NTG SITE 3 | TGGAGCATCTGAGTCCAGGG  | GGTAGACGGCAGTTCAAGTG |
| NAA SITE 3 | GAGCATCTGAGTCCAGGGGA  | GACAGGGTAGACGGCAGTTC |
| NCG SITE 3 | GAACAGCTTCGGGGGGATTG  | CTTGTAGAGAGACAGGGTAG |
| NGA SITE 3 | GGGATTGCATGTACGCCCA   | CCAGTGCTCCGGACTTGTAG |
| NGG SITE 3 | GTACGCCCACTTTTGGGAG   | GTCCAGTGCTCCGGACTTGT |
| NAT SITE 3 | CACTCCTTGTGCCCATTTGG  | GTTGTAGTAGTCGCGACTCT |
| DEFB132    | GGGAGACAGCATTGTTTCATG | TAAAGAGGAGCCTTGGCTAG |
| KRT4       | GTTCTTGGGCCGTGTAGTTC  | CCAAGGTATCTAGCTGCTTC |
| LRIT3      | AGTAAGCTTCCTCCAGCCAG  | GGGTTCCAAGCCATCTATGG |
| OVGP1      | TGAGATCCACGGAAGTGTG   | AGGGGTCACAGACTGATAAC |
| PYROXD2    | GTCCCAAGTCATCTCGGATG  | CGTGCAGCTGTCTTTACCTC |
| SEC16B     | GGGCAGAAATACATCTGTGG  | TCCAGGGACACTGGGTCTTC |
| TGFBR3     | TCATCGTTCTTAGCCCAAGG  | AAGCCCACTTCACCAGATTC |
| WDR90      | TGTTGCCTTCTCCACCGATG  | GGGCTGCTTTACCTCTTTGC |
| MAP4       | GCCCCTTGTAGGAGAACTCC  | CCTAACTTACCTGAGGTCTC |
| SYNM       | TGAAGGGCATCTCCTCCAAG  | TCTTTGCTCAGCTCCTCCAG |
